# Supplementary material
Source: publisher site journal article supplement (https://www.dovepress.com/article/427815)
Supplement: Supplementary file 1 [file get_supplementary_file.php]

Supplementary Table 1: FDA (Manufacturer’s) Nomogram

| **White to White (mm)** | **ACD (mm)** | **Recommended ICL Size (mm)** |
| --- | --- | --- |
| <10.5 | All | Not recommended |
| 10.5-10.6 | ≤3.5 | Not recommended |
| 10.5-10.6 | >3.5 | 12.1 |
| 10.7-11.0 | All | 12.1 |
| 11.1 | ≤3.5 | 12.1 |
| 11.1 | >3.5 | 12.6 |
| 11.2-11.4 | All | 12.6 |
| 11.5-11.6 | ≤3.5 | 12.6 |
| 11.5-11.6 | >3.5 | 13.2 |
| 11.7-12.1 | All | 13.2 |
| 12.2 | ≤3.5 | 13.2 |
| 12.2 | >3.5 | 13.7 |
| 12.3-12.9 | All | 13.7 |
| ≥13 | All | Not recommended |

Abbreviations: ACD, anterior chamber depth; ICL, implantable collamer lens; mm, millimeters

Supplementary Table 2: Optimized White to White Nomogram

| **White to White (mm)** | **Recommended ICL Size (mm)** |
| --- | --- |
| 10.7-11.4 | 12.1 |
| 11.5-12.1 | 12.6 |
| 12.2-12.7 | 13.2 |
| 12.8-13.1 | 13.7 |

Abbreviations: ICL, implantable collamer lens; mm, millimeters

Supplementary Table 3: Parkhurst Nomogram

|  | **Sulcus to Sulcus (mm)** | **Recommended ICL Size (mm)** |
| --- | --- | --- |
| Lens Rise 650-900 microns | <10.8 | 12.1 |
| 10.8-11.7 | 12.6 |
| 11.8-12.9 | 13.2 |
| ≥13.0 | 13.7 |
| Lens Rise >900 microns | <10.6 | 12.1 |
| 10.6-11.5 | 12.6 |
| 11.6-12.7 | 13.2 |
| ≥12.8 | 13.7 |
| Lens Rise <650 microns | <11.0 | 12.1 |
| 11.0-11.9 | 12.6 |
| 12.0-13.1 | 13.2 |
| ≥13.2 | 13.7 |

Abbreviations: ICL, implantable collamer lens; mm, millimeters

Supplementary Table 4: Dougherty Nomogram

| **Sulcus to Sulcus (mm)** | **Recommended ICL Size (mm)** |
| --- | --- |
| <11.0 | 12.1 |
| 11.1-12.2 | 12.6 |
| 12.3-12.9 | 13.2 |
| >13.0 | 13.7 |
| If power of ICL is -3.00 to -7.50, go larger at threshold; if power is -8.00 to -16.00, go smaller at threshold | |

Abbreviations: ICL, implantable collamer lens; mm, millimeters
